# Supplementary material for: The Real-Life Effectiveness and Care Patterns of Diabetes Management Study for Balkan Region (Slovenia, Croatia, Serbia, Bulgaria): A Multicenter, Observational, Cross-Sectional Study
Source: Springer Nature journal article supplement (doi:10.1007/s13300-017-0288-x), 2017-07-10
Supplement: MOESM1 [file 13292168]

**Appendix: Patient questionnaire**
